# Supplementary material
Source: publisher site journal article supplement (https://neobiota.pensoft.net/article/23562/download/suppl/31/)
Supplement: Supplementary file 1

**Supplementary file 1**

***Ambrosia artemisiifolia* control in agricultural areas: effect of grassland seeding and herbivory by the exotic leaf beetle *Ophraella communa***

**Cardarelli Elisa1, Musacchio Arianna1, Montagnani Chiara2, Bogliani Giuseppe1, Citterio Sandra2, Gentili Rodolfo2**

**1** Department of Earth and Environmental Science, University of Pavia, Via Ferrata 9, 27100 Pavia, Italy **2** Department of Earth and Environmental Sciences, University of Milano-Bicocca, Piazza della Scienza 1, 20126 Milano, Italy

Corresponding author: Cardarelli Elisa ([elisa.cardarelli@unipv.it](mailto:elisa.cardarelli@unipv.it))

Table S1. Soil characteristic in the three investigated sites. Abbreviations = Texture: Sc: coarse sand, Sf: fine sand, Stot: total sand; Texture class: FS: sandy loam; Elements: C: carbon, Ntot: total nitrogen, C/N, S.O.M.: soil organic matter, CEC: cations exchange capacity, Cations: Ca++, Mg++ K+, BSR: base-cation saturation ratio, AvP: available phosphorus.

| Analysis    Sites | Apparent texture | | | | | | | | | | Texture class  USDA | | pH (H2O) | | | pH (KCl) |
| --- | --- | --- | --- | --- | --- | --- | --- | --- | --- | --- | --- | --- | --- | --- | --- | --- |
| Sc(µm) | | | Sf(µm) | | Stot(µm) | | Silt (µm) | Clay (µm) | |
| 2000-100 | | | 100-50 | | 2000-50 | | 50-0,2 | <0,2 | |
| g/Kg | | | | | | | | | |
| X | 551 | | | 97 | | 648 | | 279 | 73 | | FS | | 6,2 | | | 5,2 |
| Y | 495 | | | 100 | | 595 | | 321 | 84 | | FS | | 5,0 | | | 4,7 |
| Z | 522 | | | 120 | | 642 | | 263 | 95 | | FS | | 5,7 | | | 4,8 |
|  |  | | | | | | | | | | | | | | | |
| Analysis    Sites | | Elements  Elements Ca++  Mg++  K+ | | | | | | | | | | | | | | |
| C org. | S.O.M. | | N tot. | C/N | CEC | | Ca++ | Mg++ | | K+ | | BSR | AvP | |
| g/Kg | | | | cmol(+)/Kg | | | | | | |  | mg/Kg | |
| X | | 23 | 39 | | 2 | 11,3 | 13,94 | | 4,28 | 0,48 | | 0,2 | | 35,6 | 24 | |
| Y | | 30 | 51 | | 2,95 | 10,1 | 11,38 | | 1,45 | 0,33 | | 0,03 | | 15,9 | 51 | |
| Z | | 28 | 48 | | 2,79 | 10,0 | 10,63 | | 2,74 | 0,48 | | 0,12 | | 31,4 | 52 | |

Table S2.*O. communa* density on non target species throughout summer 2015. Non target species with total number of monitored individuals and number of *O. communa* per plant, summed-up all life stages, during each sampling session performed between June and September 2015. Sampling session is reported in the format day/month and symbol (-) means that no plant was observed in that date.

| **Species** | **no. plants** | **individual / plant** | | | | | | | | |
| --- | --- | --- | --- | --- | --- | --- | --- | --- | --- | --- |
|  |  | **4/6** | **18/6** | **2/7** | **16/7** | **31/7** | **13/8** | **25/8** | **8/9** | **22/9** |
| *Achillea millefolium* | 151 | 0.07 | 0 | 0 | 0 | 0.2 | 0.5 | 0 | 0.3 | 0 |
| *Arrhenatherum elatius* | 80 | 0 | 0 | 0 | 0.4 | 0 | - | 0 | - | - |
| *Artemisia verlotiorum* | 189 | 0 | 0 | 0 | 2.95 | 0.16 | 0.22 | 0.16 | 0.36 | 0.7 |
| *Centaurea* sp.pl. | 220 | 0 | 0 | 0.07 | 0.85 | 0.1 | 0.09 | 0.07 | 0.09 | 0.44 |
| *Chenopodium album* | 100 | 0 | 0 | 0 | 1.07 | 0.2 | 0.3 | 0 | 0 | 0 |
| *Erigeron annuus* | 68 | 0 | 0 | 0 | 0.17 | 0 | 1 | 0 | 0 | 0 |
| *Holcus lanatus* | 110 | 0 | 0 | 0 | 0 | 0 | 0.04 | - | - | - |
| *Lolium* sp. pl. | 45 | 0 | 0 | 0 | - | - | - | - | - | - |
| *Papaver rhoeas* | 22 | 0 | 0 | 0 | - | - | - | - | - | - |
| *Persicaria maculosa* | 10 | - | - | 0 | - | - | - | - | - | - |
| *Polygonum* sp. pl. | 10 | - | 0 | - | - | - | - | - | - | - |
| *Sorghum halepense* | 55 | 0.4 | 0 | 0 | 0 | 0 | 0 | 0 | 0 | 0 |
| *Trifolium* sp.pl. | 195 | 0 | 0 | 0.2 | 0.2 | 0.2 | 0 | 0.03 | 0 | 0.12 |
| Reference on  *Ambrosia artemisiifolia* | 269 | 0.2 | 0.6 | 0.87 | 4.17 | 4.53 | 3.10 | 2.43 | 9.73 | 9.5 |

**
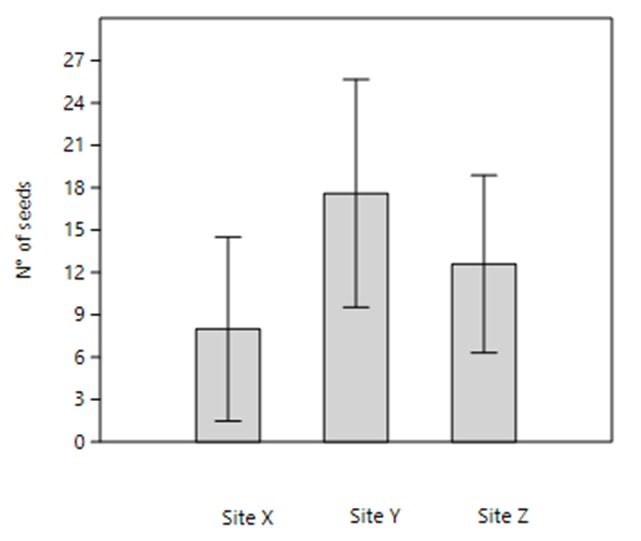
**

Figure S1. *A. artemisiifolia* soil seed bank in the three sites (X: short-rotation clover field, 45°35'42.37" N, 8°51'52.99" E; Y: oat field, 45°35'54" N, 8°52'9" E; Z: short-rotation meadow, 45°35'37" N, 8°52'14" E). The soil seed bank was investigated according to the “Manual for Ambrosia soil seed bank analysis” prepared during the SMARTER project’s from 2014 to 2016 (http://internationalragweedsociety.org/smarter/wp-content/uploads/Soil-seed-bank-of-Ambrosia-art-leaflet-new12-12-2016.pdf, accessed 7 November 2017). No difference in the soil seed bank of the weed was detected among the sites (*X2* = 3.71, DF = 2, NS).


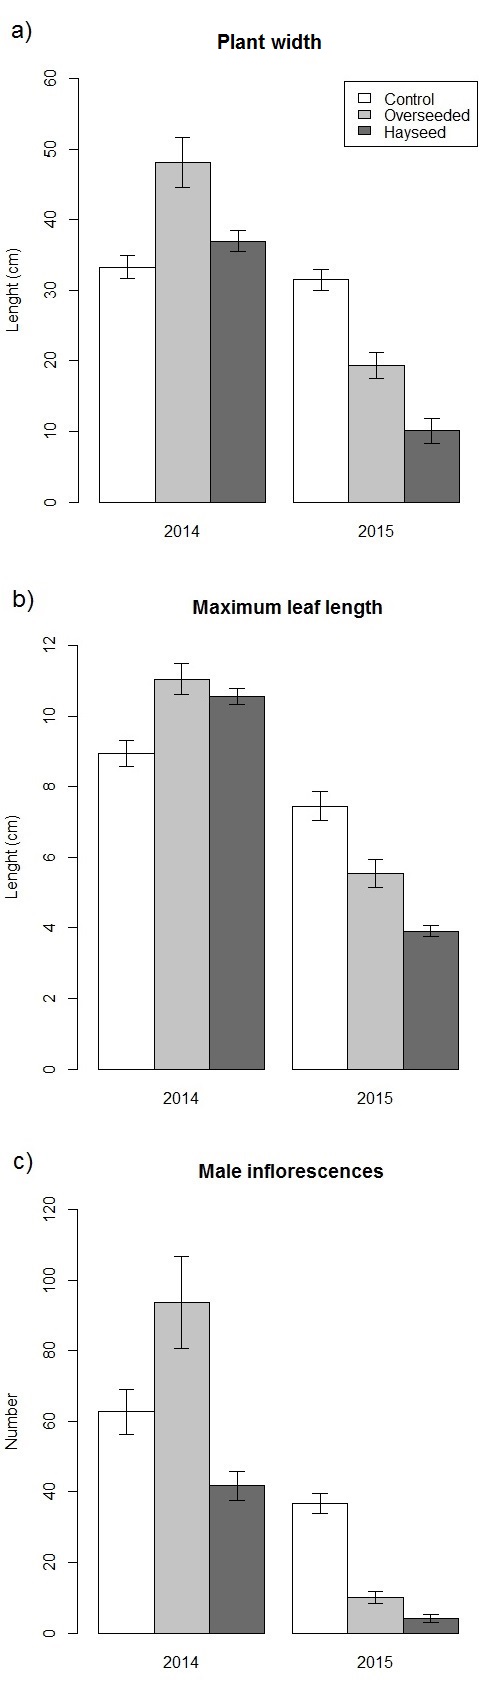


Figure S2. *A. artemisiifolia* traits in experimental plots. Mean values (± SE) for (a) plant width, (b) maximum leaf length and (c) number of male inflorescences of *A. artemisiifolia* in the three treatments (control, overseeded and hayseed) in September 2014 and 2015.
